# Supplementary material for: Aspekte einer prozessorientierten Systemarchitektur für Informationssysteme im Gesundheitswesen
Source: Royal Society of Chemistry journal article supplement (doi:10.1039/d2tb00012a), 2004-01-01

**Supporting Information For**  
**Near-infrared upper phenyl-fused BODIPY as photosensitizer for**  
**photothermal-photodynamic therapy**

Tao Yu<sup>a†</sup>, Dongxiang Zhang<sup>a†</sup>, Jie Wang<sup>b†</sup>, Changliang Sun<sup>a</sup>, Tianfang Cui<sup>a</sup>, Zhangrun Xu<sup>b</sup>, Xin-Dong Jiang<sup>a,\*</sup> and Jianjun Du<sup>c,\*</sup>

<sup>a</sup> Liaoning & Shenyang Key Laboratory of Functional Dye and Pigment, Shenyang University of Chemical Technology, Shenyang, China. E-mail: xdjiang@syuct.edu.cn

<sup>b</sup> Department of Chemistry, College of Sciences, Northeastern University, Shenyang, China

<sup>c</sup> State Key Laboratory of Fine Chemicals, Dalian University of Technology, Dalian, China. E-mail: dujj@dlut.edu.cn

† These three authors contributed equally to this work.

|                                     |            |
|-------------------------------------|------------|
| <b>1. Table</b> .....               | <b>S2</b>  |
| <b>2. Figures</b> .....             | <b>S3</b>  |
| <b>3. NMR and HRMS</b> .....        | <b>S7</b>  |
| <b>4. X-ray data for BBDP</b> ..... | <b>S9</b>  |
| <b>5. ChekCIF of BBDP</b> .....     | <b>S19</b> |

## 1. Table

**Table S1** Spectral data of **BBDP** in different solutions.

| BBDP                            | $\lambda_{\text{abs}}/\lambda_{\text{em}}$ (nm) | Stokes-shift (nm) | fwhm (nm) | $\epsilon [10^5 \cdot \text{M}^{-1} \cdot \text{cm}^{-1}]$ |
|---------------------------------|-------------------------------------------------|-------------------|-----------|------------------------------------------------------------|
| DMSO                            | 778/827                                         | 49                | 125.46    | 2.15                                                       |
| CH <sub>2</sub> Cl <sub>2</sub> | 760/812                                         | 52                | 117.08    | 1.59                                                       |
| MeOH                            | 754/812                                         | 58                | 106.28    | 1.72                                                       |
| THF                             | 756/810                                         | 54                | 106.27    | 2.03                                                       |
| MeCN                            | 754/817                                         | 63                | 110.38    | 1.73                                                       |
| EtOAc                           | 750/808                                         | 60                | 96.30     | 1.95                                                       |
| H <sub>2</sub> O                | 774/821                                         | 47                | 164.51    | 1.29                                                       |

Note: "fwhm" is an abbreviation for full width at half maxima.

## 2. Figures

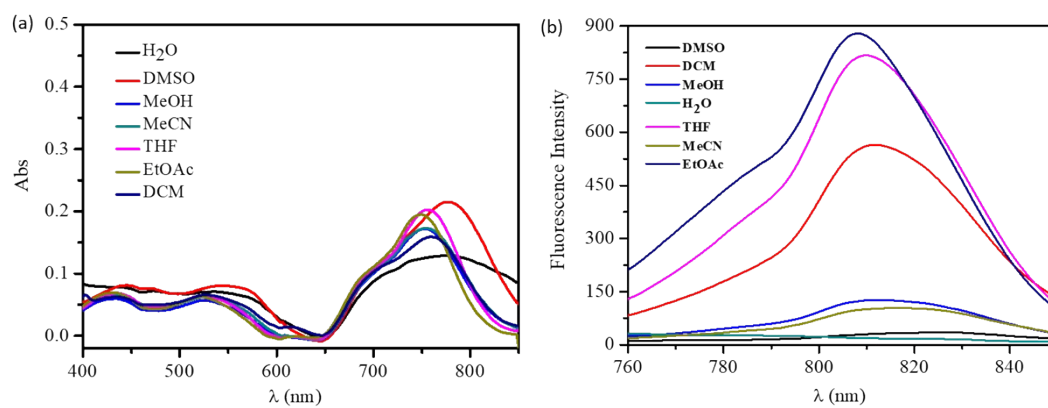

**Fig. S1** (a) Absorption spectra and (b) fluorescence spectra in different solvents.

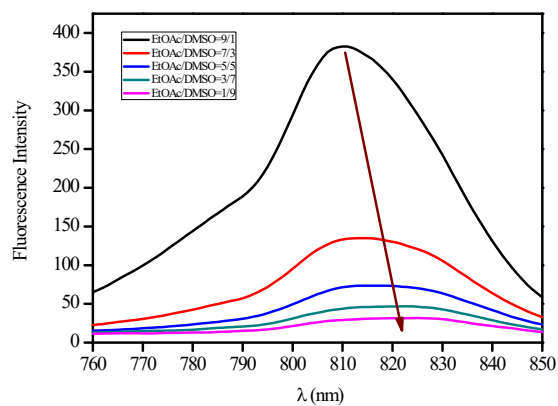

**Fig. S2** Absorption spectra at different ratios of ethyl acetate and DMSO from 9:1, 7:3, 5:5, 3:7 to 1:9.

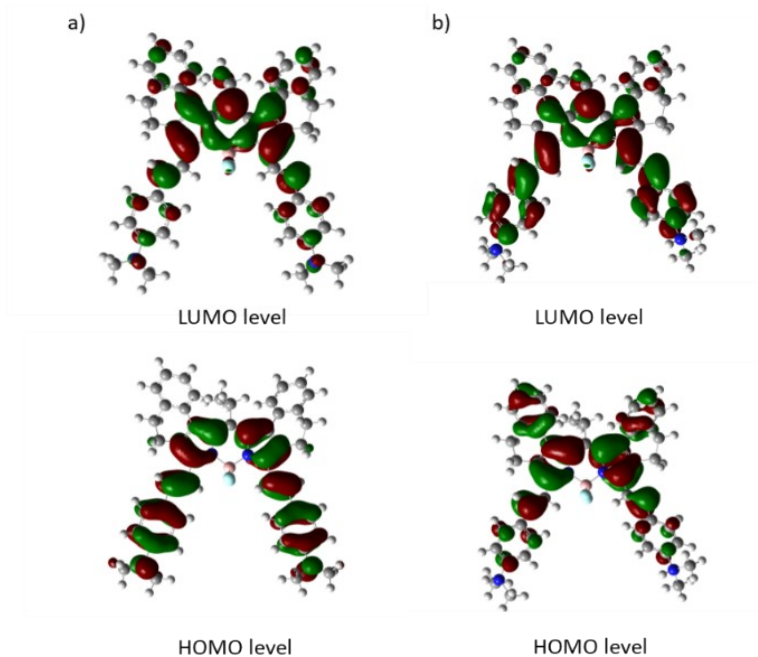

**Fig. S3** Frontier molecular orbitals have been performed at the Becke3LYP (B3LYP) level with 6-31+G(d,p) base sites. (a) HOMO/LUMO= -4.67/-2.69 eV,  $\Delta = 1.98$  eV for **BBDP**; (b) HOMO/LUMO= -8.92/-6.74 eV,  $\Delta = 2.18$  eV for **BBDP-2H<sup>+</sup>**.

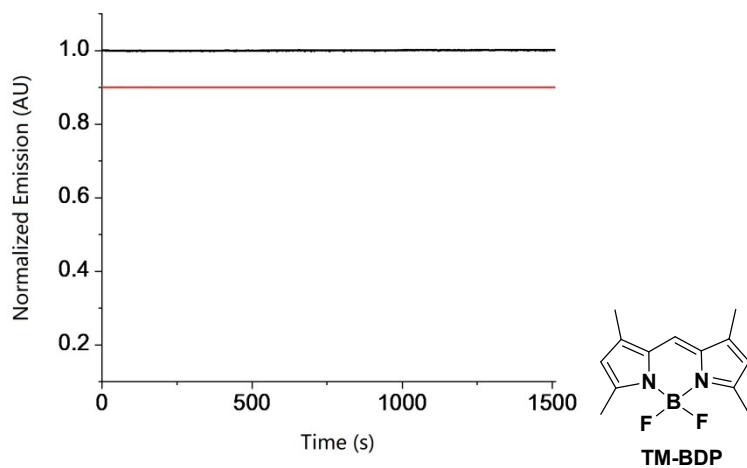

**Fig. S4** Fluorescence intensity variations (810 nm for **BBDP**, 540 nm for **TM-BDP**) of 5  $\mu$ M **BBDP** (black line) and **TM-BDP** (red line) under continuous irradiation with 760 nm for **BBDP**, 470 nm for **TM-BDP** in toluene, and the light power density is 0.5 mW/cm<sup>2</sup>, the slit width was 8.0 nm for excitation, and 1 nm for emission. Note: for clarity, the initial normalized intensities are arbitrarily designated as 1.0 and 0.9, respectively.

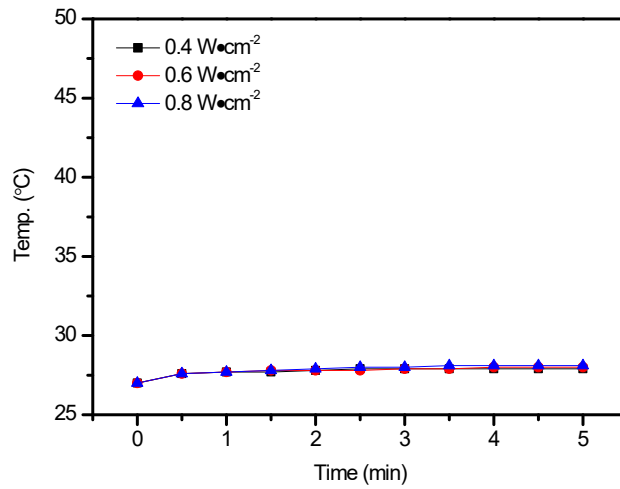

**Fig. S5** The temperature of aqueous solution without NPs under different power density (0.4, 0.6, 0.8 W·cm<sup>-2</sup>) radiation within 5 min.

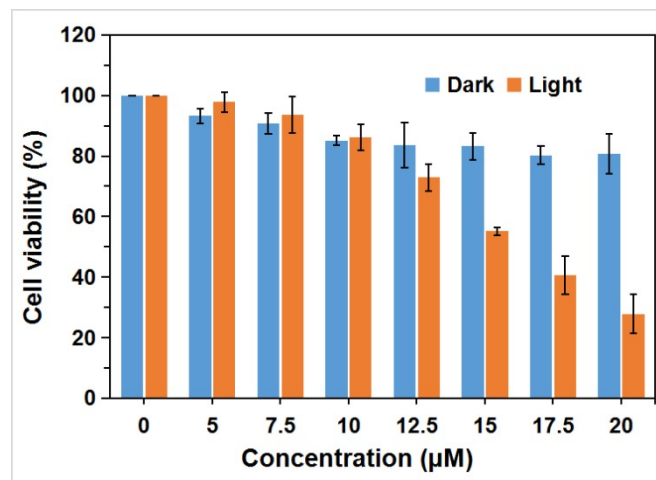

**Fig. S6** MTT assay of different concentrations from 0-20 μM with or without light radiation respectively. 635 nm NIR laser (10 mW·cm<sup>-2</sup>) was applied for 20 min irradiation.

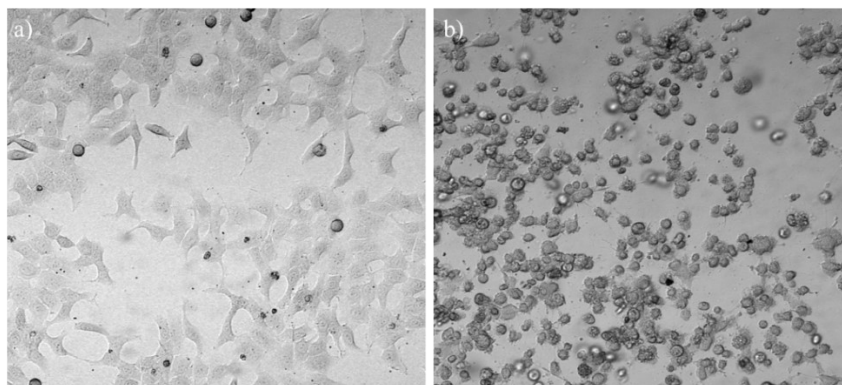

**Fig. S7** Bright field photograph of cell. (a) only NPs treated; (b) NPs + light radiation treated.

### 3. NMR and HRMS

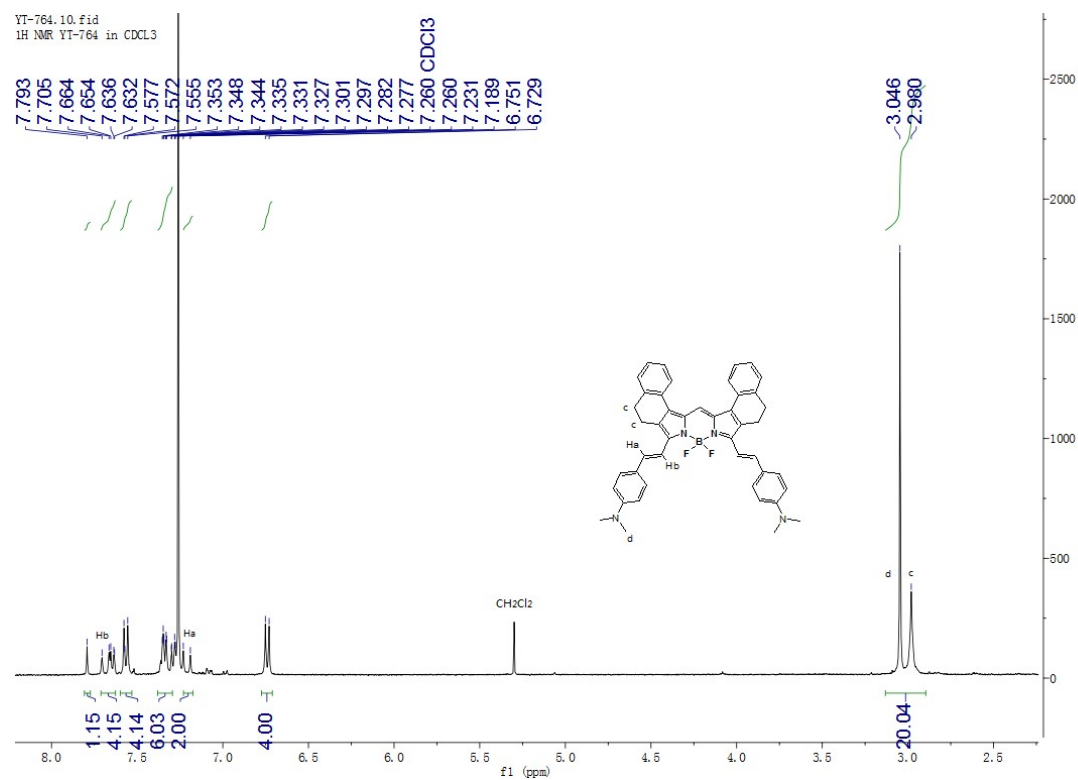

<sup>1</sup>H NMR spectrogram for dye BBDP. <sup>1</sup>H NMR (400 MHz, CDCl<sub>3</sub>) δ 7.79 (s, 1H), 7.68 (d, J = 16 Hz, 2H), 7.64 (d, J = 8.8 Hz, 2H), 7.56 (d, J = 8.8 Hz, 4H), 7.38 – 7.29 (m, 6H), 7.20 (d, J = 16 Hz, 2H), 6.73 (d, J = 8.8 Hz, 4H), 3.05 (s, 12H), 2.98 (s, 8H).

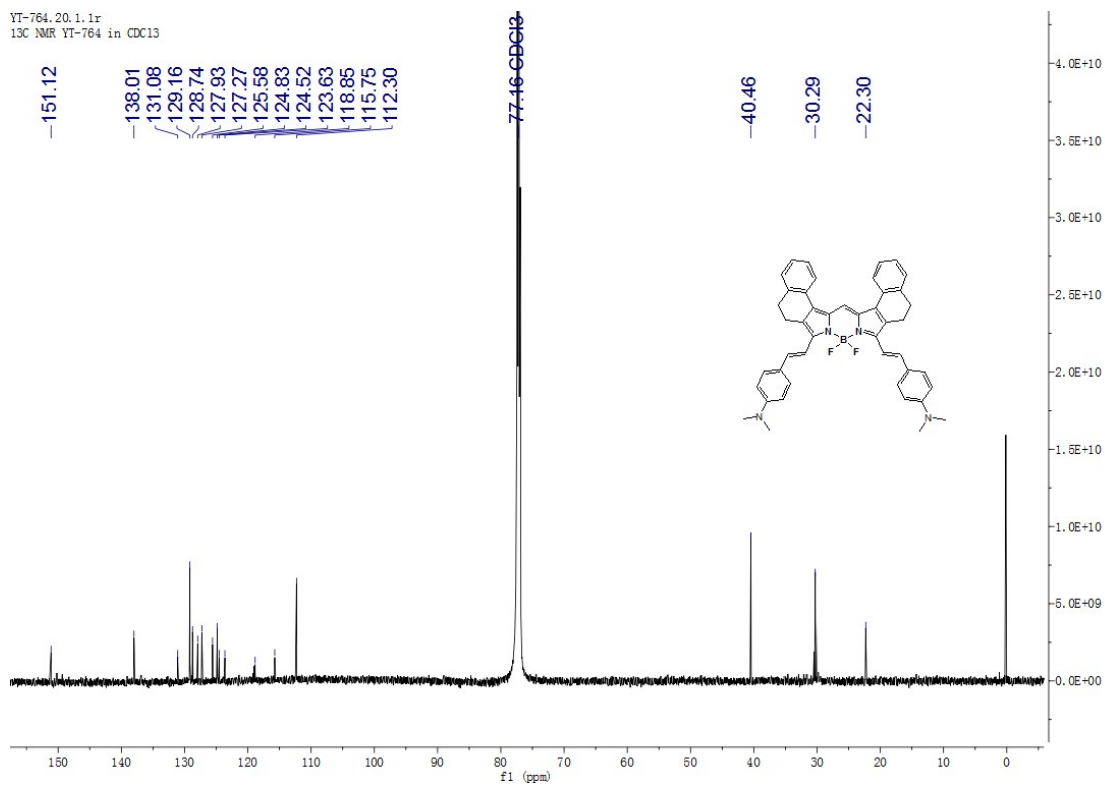

<sup>13</sup>C NMR spectrogram for dye **BBDP**. <sup>13</sup>C NMR (125 MHz, CDCl<sub>3</sub>) δ 151.1, 138.0, 131.1, 129.1, 128.7, 127.9, 127.2, 125.5, 124.8, 124.5, 123.6, 118.8, 115.7, 112.3, 40.4, 30.2, 22.3.

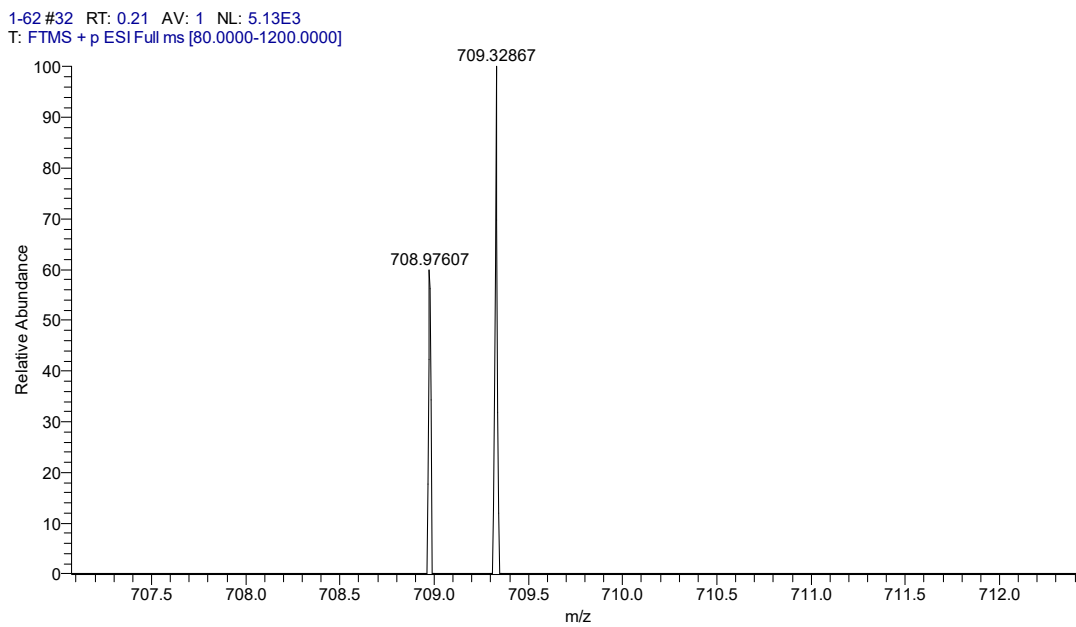

HRMS (ESI) m/z calcd for C<sub>45</sub>H<sub>41</sub>BF<sub>2</sub>N<sub>4</sub>Na<sup>+</sup> (M+Na)<sup>+</sup> 709.32846, found 709.32867.



## 4. X-ray data for BBDP

**Table 1 Crystal data and structure refinement for YT-2.**

|                                             |                                                                |
|---------------------------------------------|----------------------------------------------------------------|
| Identification code                         | YT-2                                                           |
| Empirical formula                           | C <sub>45</sub> H <sub>41</sub> BF <sub>2</sub> N <sub>4</sub> |
| Formula weight                              | 686.63                                                         |
| Temperature/K                               | 170.00(10)                                                     |
| Crystal system                              | monoclinic                                                     |
| Space group                                 | P2 <sub>1</sub> /n                                             |
| a/Å                                         | 7.3953(3)                                                      |
| b/Å                                         | 23.4385(8)                                                     |
| c/Å                                         | 20.7039(7)                                                     |
| α/°                                         | 90                                                             |
| β/°                                         | 98.181(3)                                                      |
| γ/°                                         | 90                                                             |
| Volume/Å <sup>3</sup>                       | 3552.2(2)                                                      |
| Z                                           | 4                                                              |
| ρ <sub>calc</sub> /g/cm <sup>3</sup>        | 1.284                                                          |
| μ/mm <sup>-1</sup>                          | 0.653                                                          |
| F(000)                                      | 1448.0                                                         |
| Crystal size/mm <sup>3</sup>                | 0.14 × 0.12 × 0.1                                              |
| Radiation                                   | Cu Kα (λ = 1.54184)                                            |
| 2θ range for data collection/°              | 5.728 to 147.84                                                |
| Index ranges                                | -8 ≤ h ≤ 8, -23 ≤ k ≤ 29, -25 ≤ l ≤ 16                         |
| Reflections collected                       | 14389                                                          |
| Independent reflections                     | 6949 [R <sub>int</sub> = 0.0830, R <sub>sigma</sub> = 0.0788]  |
| Data/restraints/parameters                  | 6949/0/473                                                     |
| Goodness-of-fit on F <sup>2</sup>           | 0.980                                                          |
| Final R indexes [I >= 2σ(I)]                | R <sub>1</sub> = 0.0640, wR <sub>2</sub> = 0.1605              |
| Final R indexes [all data]                  | R <sub>1</sub> = 0.0866, wR <sub>2</sub> = 0.1778              |
| Largest diff. peak/hole / e Å <sup>-3</sup> | 0.36/-0.33                                                     |

### Crystal structure determination of [YT-2]

**Crystal Data** for C<sub>45</sub>H<sub>41</sub>BF<sub>2</sub>N<sub>4</sub> (*M* = 686.63 g/mol): monoclinic, space group P2<sub>1</sub>/n (no. 14), *a* = 7.3953(3) Å, *b* = 23.4385(8) Å, *c* = 20.7039(7) Å, β = 98.181(3)°, *V* = 3552.2(2) Å<sup>3</sup>, *Z* = 4, *T* = 170.00(10) K, μ(Cu Kα) = 0.653 mm<sup>-1</sup>, *D*<sub>calc</sub> = 1.284 g/cm<sup>3</sup>, 14389 reflections measured (5.728° ≤ 2θ ≤ 147.84°), 6949 unique (*R*<sub>int</sub> = 0.0830, *R*<sub>sigma</sub> = 0.0788) which were used in all calculations. The final *R*<sub>1</sub> was 0.0640 (*I* > 2σ(*I*)) and *wR*<sub>2</sub> was 0.1778 (all data).

### Refinement model description

**Table 2 Fractional Atomic Coordinates ( $\times 10^4$ ) and Equivalent Isotropic Displacement Parameters ( $\text{\AA}^2 \times 10^3$ ) for YT-2.  $U_{\text{eq}}$  is defined as 1/3 of of the trace of the orthogonalised  $U_{ij}$  tensor.**

| Atom | <i>x</i>   | <i>y</i>    | <i>z</i>    | $U(\text{eq})$ |
|------|------------|-------------|-------------|----------------|
| F1   | 3998.1(19) | 2144.1(6)   | 7003.5(6)   | 34.2(3)        |
| F2   | 7072(2)    | 2253.3(6)   | 7207.6(6)   | 35.6(4)        |
| N1   | 5644(3)    | 2224.2(8)   | 6081.7(8)   | 23.1(4)        |
| N2   | 5881(2)    | 1347.8(8)   | 6780.4(8)   | 23.4(4)        |
| N3   | 3843(3)    | 5687.3(9)   | 7725.2(10)  | 36.7(5)        |
| N4   | 4943(3)    | 1742.9(10)  | 10995.6(10) | 43.0(6)        |
| C1   | 5940(3)    | 2234.5(9)   | 5006.4(10)  | 23.4(5)        |
| C2   | 6443(3)    | 2116.2(9)   | 4361.6(10)  | 22.9(5)        |
| C3   | 7723(3)    | 1707.3(10)  | 4245.5(11)  | 27.0(5)        |
| C4   | 8234(3)    | 1647.1(10)  | 3628.4(11)  | 30.2(5)        |
| C5   | 7441(4)    | 1993.5(10)  | 3124.0(11)  | 33.0(5)        |
| C6   | 6167(3)    | 2401.6(10)  | 3234.3(11)  | 31.2(5)        |
| C7   | 5684(3)    | 2478.3(10)  | 3851.6(10)  | 25.7(5)        |
| C8   | 4358(3)    | 2931.1(10)  | 4000.2(11)  | 30.9(5)        |
| C9   | 4973(3)    | 3228.2(10)  | 4659.6(10)  | 27.6(5)        |
| C10  | 5402(3)    | 2774.8(9)   | 5175.1(10)  | 24.3(5)        |
| C11  | 5292(3)    | 2769.6(9)   | 5852.2(11)  | 23.9(5)        |
| C12  | 6021(3)    | 1885.0(9)   | 5570.3(10)  | 23.0(5)        |
| C13  | 6244(3)    | 1299.7(9)   | 5647.5(10)  | 23.6(5)        |
| C14  | 6171(3)    | 1027.8(9)   | 6236.4(10)  | 23.3(5)        |
| C15  | 6268(3)    | 439.6(9)    | 6420.7(11)  | 24.0(5)        |
| C16  | 6675(3)    | -70.1(10)   | 6057.6(11)  | 25.5(5)        |
| C17  | 7501(3)    | -60.7(11)   | 5493.4(11)  | 32.1(5)        |
| C18  | 7959(4)    | -563.1(11)  | 5197.7(12)  | 36.7(6)        |
| C19  | 7619(3)    | -1086.2(11) | 5473.7(13)  | 36.3(6)        |
| C20  | 6823(3)    | -1100.2(10) | 6037.7(12)  | 33.1(6)        |
| C21  | 6339(3)    | -602.3(10)  | 6336.1(11)  | 28.5(5)        |
| C22  | 5362(4)    | -625.0(10)  | 6923.6(12)  | 33.8(5)        |
| C23  | 5850(3)    | -142.9(10)  | 7417.7(11)  | 27.5(5)        |
| C24  | 5966(3)    | 412.6(10)   | 7065.8(10)  | 24.3(5)        |
| C25  | 5788(3)    | 980.2(10)   | 7292.6(10)  | 23.1(5)        |
| C26  | 5558(3)    | 1197.0(10)  | 7923.4(10)  | 26.2(5)        |
| C27  | 5588(3)    | 887.5(10)   | 8475.6(11)  | 30.6(5)        |
| C28  | 5354(3)    | 1114.7(10)  | 9112.1(11)  | 28.6(5)        |
| C29  | 5057(3)    | 1692.4(10)  | 9227.3(11)  | 29.4(5)        |

**Table 2 Fractional Atomic Coordinates ( $\times 10^4$ ) and Equivalent Isotropic Displacement Parameters ( $\text{\AA}^2 \times 10^3$ ) for YT-2.  $U_{eq}$  is defined as 1/3 of the trace of the orthogonalised  $U_{ij}$  tensor.**

| Atom | x       | y          | z           | U(eq)   |
|------|---------|------------|-------------|---------|
| C30  | 4965(3) | 1901.5(11) | 9842.7(11)  | 30.6(5) |
| C31  | 5096(3) | 1533.1(11) | 10389.0(11) | 31.6(5) |
| C32  | 5356(4) | 952.7(11)  | 10273.8(12) | 39.0(6) |
| C33  | 5508(4) | 752.9(11)  | 9655.6(12)  | 39.1(6) |
| C34  | 5176(4) | 2344.0(13) | 11136.8(13) | 46.1(7) |
| C35  | 4888(4) | 1360.7(14) | 11540.7(12) | 48.1(8) |
| C36  | 4984(3) | 3226.9(10) | 6286.9(11)  | 26.1(5) |
| C37  | 4946(3) | 3784.6(10) | 6127.6(11)  | 28.9(5) |
| C38  | 4710(3) | 4262.6(10) | 6553.2(11)  | 27.6(5) |
| C39  | 4611(3) | 4207.8(10) | 7223.7(11)  | 28.5(5) |
| C40  | 4351(3) | 4669.1(10) | 7610.7(11)  | 27.4(5) |
| C41  | 4147(3) | 5226.6(10) | 7348.0(12)  | 29.3(5) |
| C42  | 4293(4) | 5285.8(11) | 6682.0(12)  | 36.7(6) |
| C43  | 4550(4) | 4817.4(10) | 6301.3(11)  | 35.3(6) |
| C44  | 4101(4) | 6260.4(10) | 7488.7(13)  | 38.5(6) |
| C45  | 3730(4) | 5633.0(11) | 8412.5(12)  | 35.8(6) |
| B1   | 5643(4) | 2004.5(11) | 6789.4(12)  | 25.2(5) |

**Table 3 Anisotropic Displacement Parameters ( $\text{\AA}^2 \times 10^3$ ) for YT-2. The Anisotropic displacement factor exponent takes the form:  $-2\pi^2[h^2a^{*2}U_{11}+2hka^*b^*U_{12}+\dots]$ .**

| Atom | $U_{11}$ | $U_{22}$ | $U_{33}$ | $U_{23}$ | $U_{13}$ | $U_{12}$ |
|------|----------|----------|----------|----------|----------|----------|
| F1   | 41.9(8)  | 32.3(8)  | 32.2(7)  | 6.8(6)   | 18.5(6)  | 7.8(6)   |
| F2   | 47.1(8)  | 31.0(8)  | 26.4(7)  | -1.0(6)  | -2.8(6)  | -7.6(6)  |
| N1   | 30.0(10) | 20.7(9)  | 19.6(9)  | -0.1(7)  | 6.5(7)   | 1.5(8)   |
| N2   | 26.9(9)  | 23.7(10) | 20.1(9)  | 2.0(7)   | 5.4(7)   | -0.1(8)  |
| N3   | 51.7(13) | 23.5(11) | 37.1(11) | -3.6(9)  | 13.7(10) | 5.0(10)  |
| N4   | 55.6(14) | 50.9(15) | 23.8(11) | -1.8(10) | 10.3(10) | 3.0(12)  |
| C1   | 25.0(11) | 23.3(11) | 22.1(11) | 0.5(8)   | 4.7(9)   | 1.3(9)   |
| C2   | 25.7(11) | 22.0(11) | 21.0(10) | -1.6(8)  | 3.1(8)   | -2.3(9)  |
| C3   | 31.1(12) | 23.1(11) | 26.5(11) | 0.3(9)   | 3.1(9)   | 2.7(9)   |
| C4   | 33.3(12) | 29.6(12) | 28.6(12) | -4.4(9)  | 6.9(10)  | 4.3(10)  |
| C5   | 48.2(14) | 29.9(13) | 22.5(11) | -1.3(9)  | 10.5(10) | 0.5(11)  |
| C6   | 40.4(13) | 28.7(12) | 24.5(11) | 3.2(9)   | 4.8(10)  | 2.2(11)  |
| C7   | 32.3(12) | 22.8(11) | 21.8(11) | 0.2(8)   | 3.3(9)   | -0.6(9)  |
| C8   | 37.4(13) | 32.8(13) | 22.3(11) | 4.0(9)   | 3.5(10)  | 9.0(11)  |

**Table 3 Anisotropic Displacement Parameters ( $\text{\AA}^2 \times 10^3$ ) for YT-2. The Anisotropic displacement factor exponent takes the form:  $-2\pi^2[h^2a^2U_{11}+2hka^*b^*U_{12}+\dots]$ .**

| Atom | $U_{11}$ | $U_{22}$ | $U_{33}$ | $U_{23}$  | $U_{13}$ | $U_{12}$ |
|------|----------|----------|----------|-----------|----------|----------|
| C9   | 33.6(12) | 24.8(11) | 25.1(11) | 3.3(9)    | 6.1(9)   | 4.9(10)  |
| C10  | 28.3(11) | 22.5(11) | 22.6(11) | 1.4(8)    | 5.9(9)   | -0.5(9)  |
| C11  | 25.5(11) | 22.8(11) | 23.8(11) | 0.6(8)    | 4.7(9)   | 0.8(9)   |
| C12  | 25.1(11) | 23.1(11) | 21.4(10) | -1.2(8)   | 5.5(8)   | 1.3(9)   |
| C13  | 28.3(11) | 23.7(11) | 19.5(10) | 0.6(8)    | 5.4(9)   | 1.4(9)   |
| C14  | 25.0(11) | 22.0(11) | 23.6(11) | -1.5(8)   | 5.5(9)   | -1.0(9)  |
| C15  | 23.2(10) | 22.8(11) | 25.7(11) | 1.7(9)    | 2.7(9)   | -1.4(9)  |
| C16  | 25.2(11) | 24.1(11) | 26.0(11) | -1.7(9)   | -0.8(9)  | 0.4(9)   |
| C17  | 38.2(13) | 28.2(13) | 29.8(12) | 0.3(10)   | 5.0(10)  | 1.9(11)  |
| C18  | 43.8(14) | 38.0(14) | 29.3(12) | -6.5(10)  | 8.5(11)  | 1.6(12)  |
| C19  | 37.9(14) | 28.9(13) | 40.8(14) | -8.6(11)  | 1.3(11)  | 2.5(11)  |
| C20  | 32.5(12) | 22.6(12) | 42.5(14) | -0.4(10)  | -0.1(11) | -1.4(10) |
| C21  | 28.8(12) | 23.5(12) | 31.9(12) | -0.4(9)   | -0.2(9)  | -2.1(9)  |
| C22  | 39.5(13) | 24.0(12) | 39.0(13) | 4.3(10)   | 9.4(11)  | -4.2(10) |
| C23  | 31.0(12) | 25.8(12) | 26.6(11) | 5.6(9)    | 7.1(9)   | 0.6(9)   |
| C24  | 24.8(11) | 23.5(11) | 24.5(11) | 2.9(9)    | 3.0(9)   | -0.6(9)  |
| C25  | 22.9(10) | 25.9(11) | 20.7(10) | 2.6(8)    | 3.5(8)   | -2.6(9)  |
| C26  | 28.0(11) | 26.8(12) | 24.1(11) | 1.5(9)    | 4.3(9)   | -0.8(9)  |
| C27  | 38.3(13) | 27.7(12) | 25.8(12) | 0.6(9)    | 4.1(10)  | -0.8(10) |
| C28  | 34.3(12) | 29.1(12) | 22.2(11) | 2.5(9)    | 3.8(9)   | -2.9(10) |
| C29  | 31.5(12) | 30.6(13) | 26.5(12) | 7.0(9)    | 5.8(9)   | 1.2(10)  |
| C30  | 33.8(12) | 32.4(13) | 26.5(12) | 1.9(10)   | 7.9(10)  | 2.7(10)  |
| C31  | 33.1(12) | 42.3(15) | 19.9(11) | 1.7(10)   | 5.6(9)   | -1.4(11) |
| C32  | 56.2(17) | 35.9(14) | 24.5(12) | 7.6(10)   | 4.9(11)  | -6.6(13) |
| C33  | 59.2(17) | 29.5(13) | 28.7(13) | 4.4(10)   | 6.9(12)  | -6.9(12) |
| C34  | 47.0(16) | 55.6(18) | 35.2(14) | -14.6(13) | 4.1(12)  | 6.7(14)  |
| C35  | 46.3(16) | 76(2)    | 22.6(13) | 4.7(13)   | 7.6(11)  | 4.3(15)  |
| C36  | 30.7(11) | 25.9(11) | 22.9(11) | -2.0(9)   | 7.6(9)   | -0.2(9)  |
| C37  | 34.6(12) | 26.3(12) | 26.3(11) | -1.6(9)   | 6.4(10)  | 0.1(10)  |
| C38  | 32.6(12) | 23.1(11) | 27.8(11) | -1.3(9)   | 6.3(9)   | 0.1(10)  |
| C39  | 35.2(12) | 20.0(11) | 31.4(12) | 2.5(9)    | 8.4(10)  | -2.1(10) |
| C40  | 30.9(11) | 26.9(12) | 25.8(11) | 0.4(9)    | 8.7(9)   | -0.1(10) |
| C41  | 30.7(12) | 24.9(12) | 33.3(12) | -2.4(9)   | 7.5(10)  | 2.9(10)  |
| C42  | 54.2(16) | 22.7(12) | 33.8(13) | 4.3(10)   | 8.2(12)  | 4.3(11)  |
| C43  | 53.7(16) | 27.9(13) | 25.0(12) | 3.1(10)   | 8.1(11)  | 2.7(11)  |
| C44  | 45.7(15) | 23.6(12) | 48.4(15) | -2.7(11)  | 14.1(12) | 3.8(11)  |
| C45  | 35.4(13) | 36.4(14) | 36.0(13) | -6.1(11)  | 6.9(11)  | 3.1(11)  |

**Table 3 Anisotropic Displacement Parameters ( $\text{\AA}^2 \times 10^3$ ) for YT-2. The Anisotropic displacement factor exponent takes the form:  $-2\pi^2[h^2a^2U_{11}+2hka*b*U_{12}+\dots]$ .**

| Atom | $U_{11}$ | $U_{22}$ | $U_{33}$ | $U_{23}$ | $U_{13}$ | $U_{12}$ |
|------|----------|----------|----------|----------|----------|----------|
| B1   | 32.0(13) | 23.1(12) | 21.0(12) | 0.2(10)  | 5.8(10)  | -2.2(11) |

**Table 4 Bond Lengths for YT-2.**

| Atom | Atom | Length/ $\text{\AA}$ | Atom | Atom | Length/ $\text{\AA}$ |
|------|------|----------------------|------|------|----------------------|
| F1   | B1   | 1.392(3)             | C14  | C15  | 1.429(3)             |
| F2   | B1   | 1.395(3)             | C15  | C16  | 1.465(3)             |
| N1   | C11  | 1.375(3)             | C15  | C24  | 1.387(3)             |
| N1   | C12  | 1.384(3)             | C16  | C17  | 1.393(3)             |
| N1   | B1   | 1.553(3)             | C16  | C21  | 1.411(3)             |
| N2   | C14  | 1.395(3)             | C17  | C18  | 1.391(3)             |
| N2   | C25  | 1.375(3)             | C18  | C19  | 1.391(4)             |
| N2   | B1   | 1.550(3)             | C19  | C20  | 1.381(4)             |
| N3   | C41  | 1.370(3)             | C20  | C21  | 1.391(3)             |
| N3   | C44  | 1.452(3)             | C21  | C22  | 1.501(3)             |
| N3   | C45  | 1.443(3)             | C22  | C23  | 1.533(3)             |
| N4   | C31  | 1.368(3)             | C23  | C24  | 1.500(3)             |
| N4   | C34  | 1.444(4)             | C24  | C25  | 1.423(3)             |
| N4   | C35  | 1.446(3)             | C25  | C26  | 1.434(3)             |
| C1   | C2   | 1.462(3)             | C26  | C27  | 1.352(3)             |
| C1   | C10  | 1.387(3)             | C27  | C28  | 1.454(3)             |
| C1   | C12  | 1.421(3)             | C28  | C29  | 1.398(3)             |
| C2   | C3   | 1.392(3)             | C28  | C33  | 1.401(3)             |
| C2   | C7   | 1.408(3)             | C29  | C30  | 1.376(3)             |
| C3   | C4   | 1.390(3)             | C30  | C31  | 1.415(3)             |
| C4   | C5   | 1.385(3)             | C31  | C32  | 1.399(4)             |
| C5   | C6   | 1.384(3)             | C32  | C33  | 1.382(4)             |
| C6   | C7   | 1.386(3)             | C36  | C37  | 1.347(3)             |
| C7   | C8   | 1.507(3)             | C37  | C38  | 1.451(3)             |
| C8   | C9   | 1.542(3)             | C38  | C39  | 1.406(3)             |
| C9   | C10  | 1.507(3)             | C38  | C43  | 1.400(3)             |
| C10  | C11  | 1.416(3)             | C39  | C40  | 1.376(3)             |
| C11  | C36  | 1.439(3)             | C40  | C41  | 1.415(3)             |
| C12  | C13  | 1.388(3)             | C41  | C42  | 1.405(3)             |
| C13  | C14  | 1.384(3)             | C42  | C43  | 1.381(3)             |

**Table 5 Bond Angles for YT-2.**

| Atom | Atom | Atom | Angle/°    | Atom | Atom | Atom | Angle/°    |
|------|------|------|------------|------|------|------|------------|
| C11  | N1   | C12  | 108.57(17) | C18  | C17  | C16  | 121.2(2)   |
| C11  | N1   | B1   | 127.49(18) | C19  | C18  | C17  | 119.7(2)   |
| C12  | N1   | B1   | 123.94(18) | C20  | C19  | C18  | 119.5(2)   |
| C14  | N2   | B1   | 125.06(18) | C19  | C20  | C21  | 121.5(2)   |
| C25  | N2   | C14  | 108.41(18) | C16  | C21  | C22  | 119.7(2)   |
| C25  | N2   | B1   | 126.49(18) | C20  | C21  | C16  | 119.3(2)   |
| C41  | N3   | C44  | 119.8(2)   | C20  | C21  | C22  | 120.9(2)   |
| C41  | N3   | C45  | 122.0(2)   | C21  | C22  | C23  | 114.8(2)   |
| C45  | N3   | C44  | 116.3(2)   | C24  | C23  | C22  | 109.88(18) |
| C31  | N4   | C34  | 120.9(2)   | C15  | C24  | C23  | 122.4(2)   |
| C31  | N4   | C35  | 120.6(2)   | C15  | C24  | C25  | 108.06(19) |
| C34  | N4   | C35  | 117.5(2)   | C25  | C24  | C23  | 129.6(2)   |
| C10  | C1   | C2   | 121.5(2)   | N2   | C25  | C24  | 108.31(18) |
| C10  | C1   | C12  | 107.44(19) | N2   | C25  | C26  | 120.4(2)   |
| C12  | C1   | C2   | 130.9(2)   | C24  | C25  | C26  | 131.3(2)   |
| C3   | C2   | C1   | 123.8(2)   | C27  | C26  | C25  | 126.2(2)   |
| C3   | C2   | C7   | 119.6(2)   | C26  | C27  | C28  | 125.5(2)   |
| C7   | C2   | C1   | 116.40(19) | C29  | C28  | C27  | 123.5(2)   |
| C4   | C3   | C2   | 120.6(2)   | C29  | C28  | C33  | 116.5(2)   |
| C5   | C4   | C3   | 119.5(2)   | C33  | C28  | C27  | 120.0(2)   |
| C6   | C5   | C4   | 120.4(2)   | C30  | C29  | C28  | 122.2(2)   |
| C5   | C6   | C7   | 120.8(2)   | C29  | C30  | C31  | 121.1(2)   |
| C2   | C7   | C8   | 118.24(19) | N4   | C31  | C30  | 120.6(2)   |
| C6   | C7   | C2   | 119.1(2)   | N4   | C31  | C32  | 122.5(2)   |
| C6   | C7   | C8   | 122.7(2)   | C32  | C31  | C30  | 116.9(2)   |
| C7   | C8   | C9   | 112.34(19) | C33  | C32  | C31  | 121.2(2)   |
| C10  | C9   | C8   | 108.32(18) | C32  | C33  | C28  | 122.1(2)   |
| C1   | C10  | C9   | 120.29(19) | C37  | C36  | C11  | 124.7(2)   |
| C1   | C10  | C11  | 107.48(19) | C36  | C37  | C38  | 126.9(2)   |
| C11  | C10  | C9   | 132.2(2)   | C39  | C38  | C37  | 123.8(2)   |
| N1   | C11  | C10  | 108.40(19) | C43  | C38  | C37  | 120.1(2)   |
| N1   | C11  | C36  | 121.01(19) | C43  | C38  | C39  | 116.1(2)   |
| C10  | C11  | C36  | 130.5(2)   | C40  | C39  | C38  | 122.3(2)   |
| N1   | C12  | C1   | 107.93(18) | C39  | C40  | C41  | 121.2(2)   |
| N1   | C12  | C13  | 120.88(19) | N3   | C41  | C40  | 121.7(2)   |
| C13  | C12  | C1   | 130.9(2)   | N3   | C41  | C42  | 121.6(2)   |
| C14  | C13  | C12  | 122.5(2)   | C42  | C41  | C40  | 116.7(2)   |
| N2   | C14  | C15  | 108.11(18) | C43  | C42  | C41  | 121.2(2)   |

**Table 5 Bond Angles for YT-2.**

| Atom | Atom | Atom | Angle/°    | Atom | Atom | Atom | Angle/°    |
|------|------|------|------------|------|------|------|------------|
| C13  | C14  | N2   | 119.57(19) | C42  | C43  | C38  | 122.5(2)   |
| C13  | C14  | C15  | 132.3(2)   | F1   | B1   | F2   | 108.87(19) |
| C14  | C15  | C16  | 131.0(2)   | F1   | B1   | N1   | 109.89(19) |
| C24  | C15  | C14  | 107.0(2)   | F1   | B1   | N2   | 110.06(19) |
| C24  | C15  | C16  | 122.0(2)   | F2   | B1   | N1   | 110.18(19) |
| C17  | C16  | C15  | 124.3(2)   | F2   | B1   | N2   | 110.20(19) |
| C17  | C16  | C21  | 118.7(2)   | N2   | B1   | N1   | 107.63(18) |
| C21  | C16  | C15  | 116.7(2)   |      |      |      |            |

**Table 6 Torsion Angles for YT-2.**

| A  | B   | C   | D   | Angle/°   | A   | B   | C   | D   | Angle/°    |
|----|-----|-----|-----|-----------|-----|-----|-----|-----|------------|
| N1 | C11 | C36 | C37 | 167.9(2)  | C15 | C16 | C21 | C22 | 8.4(3)     |
| N1 | C12 | C13 | C14 | -2.4(3)   | C15 | C24 | C25 | N2  | 3.3(3)     |
| N2 | C14 | C15 | C16 | -175.2(2) | C15 | C24 | C25 | C26 | -176.4(2)  |
| N2 | C14 | C15 | C24 | 2.2(2)    | C16 | C15 | C24 | C23 | -6.1(3)    |
| N2 | C25 | C26 | C27 | -174.5(2) | C16 | C15 | C24 | C25 | 174.39(19) |
| N3 | C41 | C42 | C43 | -178.2(2) | C16 | C17 | C18 | C19 | -1.1(4)    |
| N4 | C31 | C32 | C33 | -180.0(3) | C16 | C21 | C22 | C23 | -37.5(3)   |
| C1 | C2  | C3  | C4  | -175.2(2) | C17 | C16 | C21 | C20 | -0.6(3)    |
| C1 | C2  | C7  | C6  | 177.5(2)  | C17 | C16 | C21 | C22 | -176.8(2)  |
| C1 | C2  | C7  | C8  | -3.2(3)   | C17 | C18 | C19 | C20 | 0.2(4)     |
| C1 | C10 | C11 | N1  | -3.8(3)   | C18 | C19 | C20 | C21 | 0.4(4)     |
| C1 | C10 | C11 | C36 | 172.8(2)  | C19 | C20 | C21 | C16 | -0.2(3)    |
| C1 | C12 | C13 | C14 | -175.7(2) | C19 | C20 | C21 | C22 | 175.9(2)   |
| C2 | C1  | C10 | C9  | 11.8(3)   | C20 | C21 | C22 | C23 | 146.4(2)   |
| C2 | C1  | C10 | C11 | -171.0(2) | C21 | C16 | C17 | C18 | 1.3(3)     |
| C2 | C1  | C12 | N1  | 171.3(2)  | C21 | C22 | C23 | C24 | 42.0(3)    |
| C2 | C1  | C12 | C13 | -14.8(4)  | C22 | C23 | C24 | C15 | -22.0(3)   |
| C2 | C3  | C4  | C5  | -0.8(4)   | C22 | C23 | C24 | C25 | 157.3(2)   |
| C2 | C7  | C8  | C9  | 41.8(3)   | C23 | C24 | C25 | N2  | -176.2(2)  |
| C3 | C2  | C7  | C6  | 3.0(3)    | C23 | C24 | C25 | C26 | 4.1(4)     |
| C3 | C2  | C7  | C8  | -177.7(2) | C24 | C15 | C16 | C17 | -160.3(2)  |
| C3 | C4  | C5  | C6  | 0.8(4)    | C24 | C15 | C16 | C21 | 14.1(3)    |
| C4 | C5  | C6  | C7  | 1.2(4)    | C24 | C25 | C26 | C27 | 5.1(4)     |
| C5 | C6  | C7  | C2  | -3.1(4)   | C25 | N2  | C14 | C13 | 177.5(2)   |
| C5 | C6  | C7  | C8  | 177.7(2)  | C25 | N2  | C14 | C15 | -0.2(2)    |
| C6 | C7  | C8  | C9  | -138.9(2) | C25 | N2  | B1  | F1  | -54.0(3)   |

**Table 6 Torsion Angles for YT-2.**

| <b>A</b> | <b>B</b> | <b>C</b> | <b>D</b> | <b>Angle/°</b> | <b>A</b> | <b>B</b> | <b>C</b> | <b>D</b> | <b>Angle/°</b> |
|----------|----------|----------|----------|----------------|----------|----------|----------|----------|----------------|
| C7       | C2       | C3       | C4       | -1.1(3)        | C25      | N2       | B1       | F2       | 66.1(3)        |
| C7       | C8       | C9       | C10      | -51.3(3)       | C25      | N2       | B1       | N1       | -173.73(19)    |
| C8       | C9       | C10      | C1       | 26.3(3)        | C25      | C26      | C27      | C28      | 179.9(2)       |
| C8       | C9       | C10      | C11      | -150.1(2)      | C26      | C27      | C28      | C29      | 0.2(4)         |
| C9       | C10      | C11      | N1       | 173.0(2)       | C26      | C27      | C28      | C33      | -176.7(2)      |
| C9       | C10      | C11      | C36      | -10.3(4)       | C27      | C28      | C29      | C30      | -175.4(2)      |
| C10      | C1       | C2       | C3       | 149.1(2)       | C27      | C28      | C33      | C32      | 177.8(3)       |
| C10      | C1       | C2       | C7       | -25.1(3)       | C28      | C29      | C30      | C31      | -2.5(4)        |
| C10      | C1       | C12      | N1       | -3.6(2)        | C29      | C28      | C33      | C32      | 0.7(4)         |
| C10      | C1       | C12      | C13      | 170.3(2)       | C29      | C30      | C31      | N4       | -177.8(2)      |
| C10      | C11      | C36      | C37      | -8.3(4)        | C29      | C30      | C31      | C32      | 1.1(4)         |
| C11      | N1       | C12      | C1       | 1.3(2)         | C30      | C31      | C32      | C33      | 1.1(4)         |
| C11      | N1       | C12      | C13      | -173.4(2)      | C31      | C32      | C33      | C28      | -2.0(4)        |
| C11      | N1       | B1       | F1       | 53.3(3)        | C33      | C28      | C29      | C30      | 1.6(4)         |
| C11      | N1       | B1       | F2       | -66.7(3)       | C34      | N4       | C31      | C30      | -18.2(4)       |
| C11      | N1       | B1       | N2       | 173.1(2)       | C34      | N4       | C31      | C32      | 162.9(3)       |
| C11      | C36      | C37      | C38      | -177.5(2)      | C35      | N4       | C31      | C30      | 173.6(2)       |
| C12      | N1       | C11      | C10      | 1.5(3)         | C35      | N4       | C31      | C32      | -5.4(4)        |
| C12      | N1       | C11      | C36      | -175.5(2)      | C36      | C37      | C38      | C39      | 4.7(4)         |
| C12      | N1       | B1       | F1       | -127.0(2)      | C36      | C37      | C38      | C43      | -174.7(2)      |
| C12      | N1       | B1       | F2       | 113.0(2)       | C37      | C38      | C39      | C40      | -178.7(2)      |
| C12      | N1       | B1       | N2       | -7.2(3)        | C37      | C38      | C43      | C42      | 178.9(2)       |
| C12      | C1       | C2       | C3       | -25.2(4)       | C38      | C39      | C40      | C41      | 0.7(4)         |
| C12      | C1       | C2       | C7       | 160.7(2)       | C39      | C38      | C43      | C42      | -0.6(4)        |
| C12      | C1       | C10      | C9       | -172.8(2)      | C39      | C40      | C41      | N3       | 178.4(2)       |
| C12      | C1       | C10      | C11      | 4.5(3)         | C39      | C40      | C41      | C42      | -2.3(4)        |
| C12      | C13      | C14      | N2       | -0.6(3)        | C40      | C41      | C42      | C43      | 2.5(4)         |
| C12      | C13      | C14      | C15      | 176.4(2)       | C41      | C42      | C43      | C38      | -1.0(4)        |
| C13      | C14      | C15      | C16      | 7.5(4)         | C43      | C38      | C39      | C40      | 0.8(4)         |
| C13      | C14      | C15      | C24      | -175.1(2)      | C44      | N3       | C41      | C40      | 164.3(2)       |
| C14      | N2       | C25      | C24      | -1.8(2)        | C44      | N3       | C41      | C42      | -14.9(4)       |
| C14      | N2       | C25      | C26      | 177.89(19)     | C45      | N3       | C41      | C40      | 0.6(4)         |
| C14      | N2       | B1       | F1       | 123.9(2)       | C45      | N3       | C41      | C42      | -178.6(2)      |
| C14      | N2       | B1       | F2       | -116.0(2)      | B1       | N1       | C11      | C10      | -178.7(2)      |
| C14      | N2       | B1       | N1       | 4.1(3)         | B1       | N1       | C11      | C36      | 4.3(3)         |
| C14      | C15      | C16      | C17      | 16.8(4)        | B1       | N1       | C12      | C1       | -178.5(2)      |
| C14      | C15      | C16      | C21      | -168.8(2)      | B1       | N1       | C12      | C13      | 6.9(3)         |
| C14      | C15      | C24      | C23      | 176.15(19)     | B1       | N2       | C14      | C13      | -0.7(3)        |



**Table 6 Torsion Angles for YT-2.**

| A   | B   | C   | D   | Angle/°   | A  | B  | C   | D   | Angle/°   |
|-----|-----|-----|-----|-----------|----|----|-----|-----|-----------|
| C14 | C15 | C24 | C25 | -3.3(2)   | B1 | N2 | C14 | C15 | -178.4(2) |
| C15 | C16 | C17 | C18 | 175.7(2)  | B1 | N2 | C25 | C24 | 176.3(2)  |
| C15 | C16 | C21 | C20 | -175.4(2) | B1 | N2 | C25 | C26 | -4.0(3)   |

**Table 7 Hydrogen Atom Coordinates ( $\text{\AA} \times 10^4$ ) and Isotropic Displacement Parameters ( $\text{\AA}^2 \times 10^3$ ) for YT-2.**

| Atom | x       | y        | z        | U(eq) |
|------|---------|----------|----------|-------|
| H3   | 8242.12 | 1472.27  | 4583.85  | 32    |
| H4   | 9100.87 | 1376.4   | 3554.69  | 36    |
| H5   | 7767.14 | 1951.78  | 2709.01  | 40    |
| H6   | 5627.13 | 2626.94  | 2890.21  | 37    |
| H8A  | 3168.6  | 2758.57  | 4007.82  | 37    |
| H8B  | 4233.96 | 3214.42  | 3655.21  | 37    |
| H9A  | 6047.66 | 3459.38  | 4632.86  | 33    |
| H9B  | 4009.04 | 3475.13  | 4769.35  | 33    |
| H13  | 6450.72 | 1082.01  | 5289.68  | 28    |
| H17  | 7751.19 | 288.08   | 5310.99  | 38    |
| H18  | 8489.89 | -549.26  | 4816.98  | 44    |
| H19  | 7924.83 | -1423.98 | 5279.95  | 44    |
| H20  | 6604.86 | -1450.83 | 6222.42  | 40    |
| H22A | 5636    | -986.85  | 7143.2   | 41    |
| H22B | 4057.01 | -614.05  | 6777.39  | 41    |
| H23A | 4926.7  | -116.7   | 7705.4   | 33    |
| H23B | 7013.45 | -224.14  | 7681.62  | 33    |
| H26  | 5368.95 | 1587.65  | 7955.54  | 31    |
| H27  | 5774.99 | 496.53   | 8446.13  | 37    |
| H29  | 4917.3  | 1943.86  | 8876.3   | 35    |
| H30  | 4813.33 | 2291.2   | 9900.64  | 37    |
| H32  | 5428.75 | 696.63   | 10619.62 | 47    |
| H33  | 5718.94 | 366.19   | 9598.8   | 47    |
| H34A | 6306.97 | 2472.2   | 11009.54 | 69    |
| H34B | 5195.81 | 2406.33  | 11596.05 | 69    |
| H34C | 4181.12 | 2553.17  | 10898.72 | 69    |
| H35A | 4021.94 | 1061.57  | 11415.37 | 72    |
| H35B | 4527.86 | 1568.89  | 11900.96 | 72    |
| H35C | 6076.34 | 1198.04  | 11667.68 | 72    |
| H36  | 4796.62 | 3130.64  | 6708.18  | 31    |

**Table 7 Hydrogen Atom Coordinates ( $\text{\AA}\times 10^4$ ) and Isotropic Displacement Parameters ( $\text{\AA}^2\times 10^3$ ) for YT-2.**

| Atom | x       | y       | z       | U(eq) |
|------|---------|---------|---------|-------|
| H37  | 5086.06 | 3872.46 | 5699.53 | 35    |
| H39  | 4726.61 | 3846.99 | 7412.04 | 34    |
| H40  | 4308.14 | 4613.57 | 8053.01 | 33    |
| H42  | 4214.11 | 5647.08 | 6494.32 | 44    |
| H43  | 4620.71 | 4872.47 | 5860.76 | 42    |
| H44A | 5355.42 | 6310.83 | 7429.16 | 58    |
| H44B | 3789.63 | 6533.16 | 7800.69 | 58    |
| H44C | 3330.57 | 6316.26 | 7079.72 | 58    |
| H45A | 2985.23 | 5309.64 | 8482.51 | 54    |
| H45B | 3196.31 | 5972.29 | 8563.98 | 54    |
| H45C | 4933.39 | 5581.11 | 8648.31 | 54    |

### Experimental

Single crystals of  $\text{C}_{45}\text{H}_{41}\text{BF}_2\text{N}_4$  [YT-2] were [ ]. A suitable crystal was selected and [ ] on a **SuperNova, Dual, Cu at zero, AtlasS2** diffractometer. The crystal was kept at 170.00(10) K during data collection.

## 5. CheckCIF of BBDP

### checkCIF/PLATON report

Structure factors have been supplied for datablock(s) yt-2

THIS REPORT IS FOR GUIDANCE ONLY. IF USED AS PART OF A REVIEW PROCEDURE FOR PUBLICATION, IT SHOULD NOT REPLACE THE EXPERTISE OF AN EXPERIENCED CRYSTALLOGRAPHIC REFEREE.

No syntax errors found.      CIF dictionary      Interpreting this report

### Datablock: yt-2

---

Bond precision:    C-C = 0.0031 A                      Wavelength=1.54184

Cell:                      a=7.3953 (3)              b=23.4385 (8)              c=20.7039 (7)  
                                    alpha=90                      beta=98.181 (3)              gamma=90

Temperature:              170 K

|                        | Calculated      | Reported        |
|------------------------|-----------------|-----------------|
| Volume                 | 3552.2 (2)      | 3552.2 (2)      |
| Space group            | P 21/n          | P 1 21/n 1      |
| Hall group             | -P 2yn          | -P 2yn          |
| Moiety formula         | C45 H41 B F2 N4 | C45 H41 B F2 N4 |
| Sum formula            | C45 H41 B F2 N4 | C45 H41 B F2 N4 |
| Mr                     | 686.63          | 686.63          |
| Dx, g cm <sup>-3</sup> | 1.284           | 1.284           |
| Z                      | 4               | 4               |
| Mu (mm <sup>-1</sup> ) | 0.653           | 0.653           |
| F000                   | 1448.0          | 1448.0          |
| F000'                  | 1452.13         |                 |
| h, k, lmax             | 9, 29, 25       | 8, 29, 25       |
| Nref                   | 7197            | 6949            |
| Tmin, Tmax             | 0.913, 0.937    | 0.193, 1.000    |
| Tmin'                  | 0.913           |                 |

Correction method= # Reported T Limits: Tmin=0.193 Tmax=1.000  
AbsCorr = MULTI-SCAN

Data completeness= 0.966                      Theta (max)= 73.920

R(reflections)= 0.0640 ( 4926)                      wR2(reflections)=  
S = 0.980                      Npar= 473                      0.1778 ( 6949)

The following ALERTS were generated. Each ALERT has the format  
**test-name\_ALERT\_alert-type\_alert-level.**  
Click on the hyperlinks for more details of the test.

● **Alert level C**

PLAT906\_ALERT\_3\_C Large K Value in the Analysis of Variance ..... 3.239 Check  
PLAT911\_ALERT\_3\_C Missing FCF Refl Between Thmin & STh/L= 0.600 9 Report

● **Alert level G**

PLAT912\_ALERT\_4\_G Missing # of FCF Reflections Above STh/L= 0.600 185 Note  
PLAT933\_ALERT\_2\_G Number of OMIT Records in Embedded .res File ... 3 Note  
PLAT941\_ALERT\_3\_G Average HKL Measurement Multiplicity ..... 2.1 Low  
PLAT978\_ALERT\_2\_G Number C-C Bonds with Positive Residual Density. 1 Info

0 **ALERT level A** = Most likely a serious problem - resolve or explain  
0 **ALERT level B** = A potentially serious problem, consider carefully  
2 **ALERT level C** = Check. Ensure it is not caused by an omission or oversight  
4 **ALERT level G** = General information/check it is not something unexpected

0 ALERT type 1 CIF construction/syntax error, inconsistent or missing data  
2 ALERT type 2 Indicator that the structure model may be wrong or deficient  
3 ALERT type 3 Indicator that the structure quality may be low  
1 ALERT type 4 Improvement, methodology, query or suggestion  
0 ALERT type 5 Informative message, check

Datablock yt-2 - ellipsoid plot

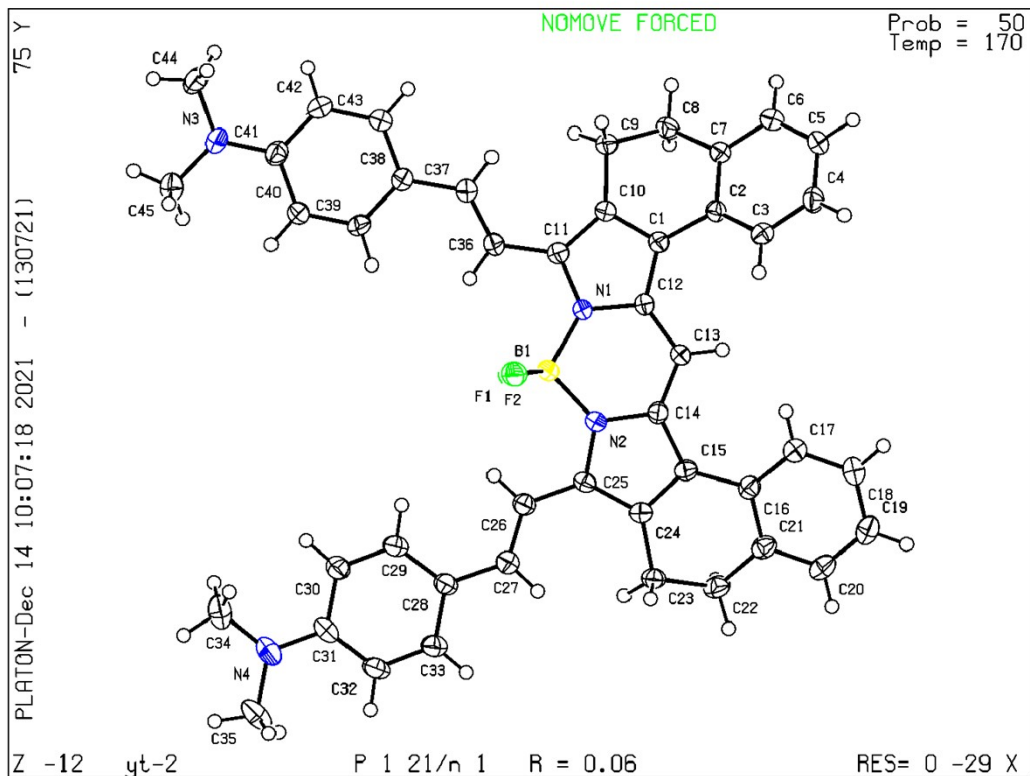

Supplement: d2tb00012a1.pdf [file d2tb00012a1.pdf]
